# Supplementary material
Source: PubMed Central journal article supplement (PMC5616087)
Supplement: ac7b01796_si_001.pdf [file ac7b01796_si_001.pdf]

# Supporting Information

## **Probing Membrane Receptor - Ligand Specificity with Surface- and Tip-Enhanced Raman Scattering**

Lifu Xiao, Karen A Bailey, Hao Wang, Zachary D Schultz\*

*Department of Chemistry and Biochemistry, University of Notre Dame, Notre Dame, Indiana 46556, USA. E-mail: [Schultz.41@nd.edu](mailto:Schultz.41@nd.edu).*

### **Contents:**

|                                                                                 |      |
|---------------------------------------------------------------------------------|------|
| Figure S1: UV-Vis characterization of functionalized GNPs                       | S-2  |
| Figure S2: SERS heatmaps from cyclic-isoDGRFC and CisoDGRC GNPs                 | S-3  |
| Figure S3: MCR calculated Q residuals from Figure 1                             | S-4  |
| Figure S4: Additional velocity profiles and trajectories on glass slides        | S-5  |
| Figure S5: TERS map of cyclic-RGDFC-GNPs bound with sw620 cells                 | S-6  |
| Figure S6: Additional TERS mapping data of SW620 cells                          | S-7  |
| Figure S7: Hyperspectral imaging of GNPs on cells                               | S-8  |
| Figure S8: Histograms of Diffusion coefficients from particle tracking on cells | S-9  |
| Table S1: Light scattering and zeta potential results from peptide-GNPs         | S-10 |
| Table S2: Band assignments from TERS experiments                                | S-11 |
| References                                                                      | S-12 |

## Characterization of peptide-functionalized GNPs

The stability of the functionalized GNPs was exhibited by the UV-Vis spectra showing a conserved plasmon resonance peak at around 545 nm (Figure S1a). Average Raman spectra ( $n=100$ ) of cyclic-RGDFC-GNPs and cyclic-isoDGRFC-GNPs showed a sharp band at  $1002\text{ cm}^{-1}$ , corresponding to the characteristic peak of phenylalanine in both ligands, which was not presented in the spectrum of CisoDGRC-GNPs (Figure S1b). The intense broad band at 1550-1600 in all three spectra is assigned to carboxyl group in the peptide ligands<sup>1</sup>. The successful functionalization is also confirmed by dynamic light scattering and zeta potential measurements, showing changes in hydrodynamic diameters and zeta potentials of the functionalized GNPs (Supporting Information, Table S1).

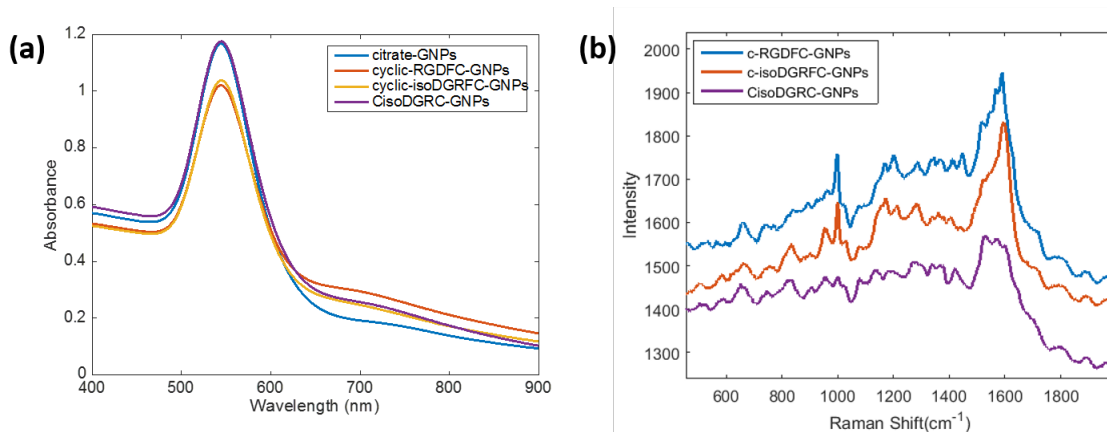

Figure S1. (a) UV-Vis spectra and (b) average Raman spectra of gold nanoparticles with ligands conjugation. The strong Raman band at  $1002\text{ cm}^{-1}$  corresponds to the phenylalanine residue present in the ligands.

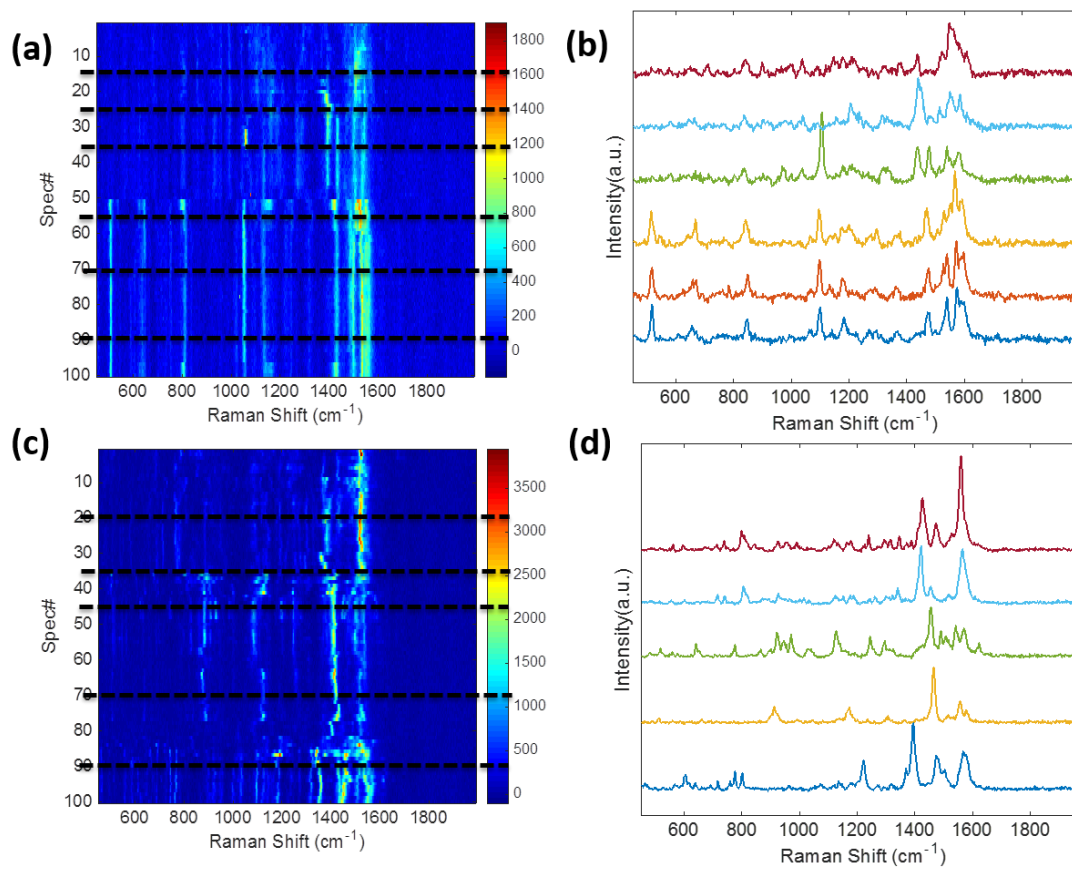

Figure S2. (a, c) Heat maps constructed from 100 consecutive SERS acquisitions of integrin  $\alpha v\beta 3$ -bound cyclic-isoDGRFC-GNPs (a) and CisoDGRFC-GNPs (c). (b, d) selected SERS spectra corresponding to dotted lines in (a) and (c).

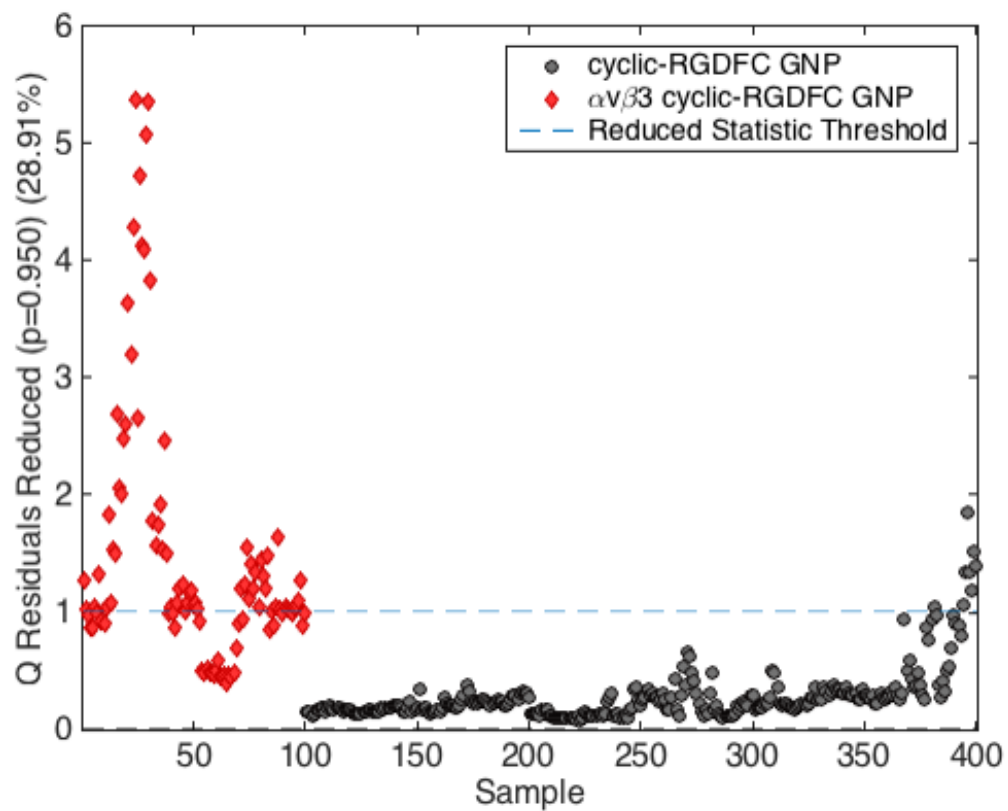

Figure S3. MCR calculated Q residuals from the SERS data shown in Figure 1.

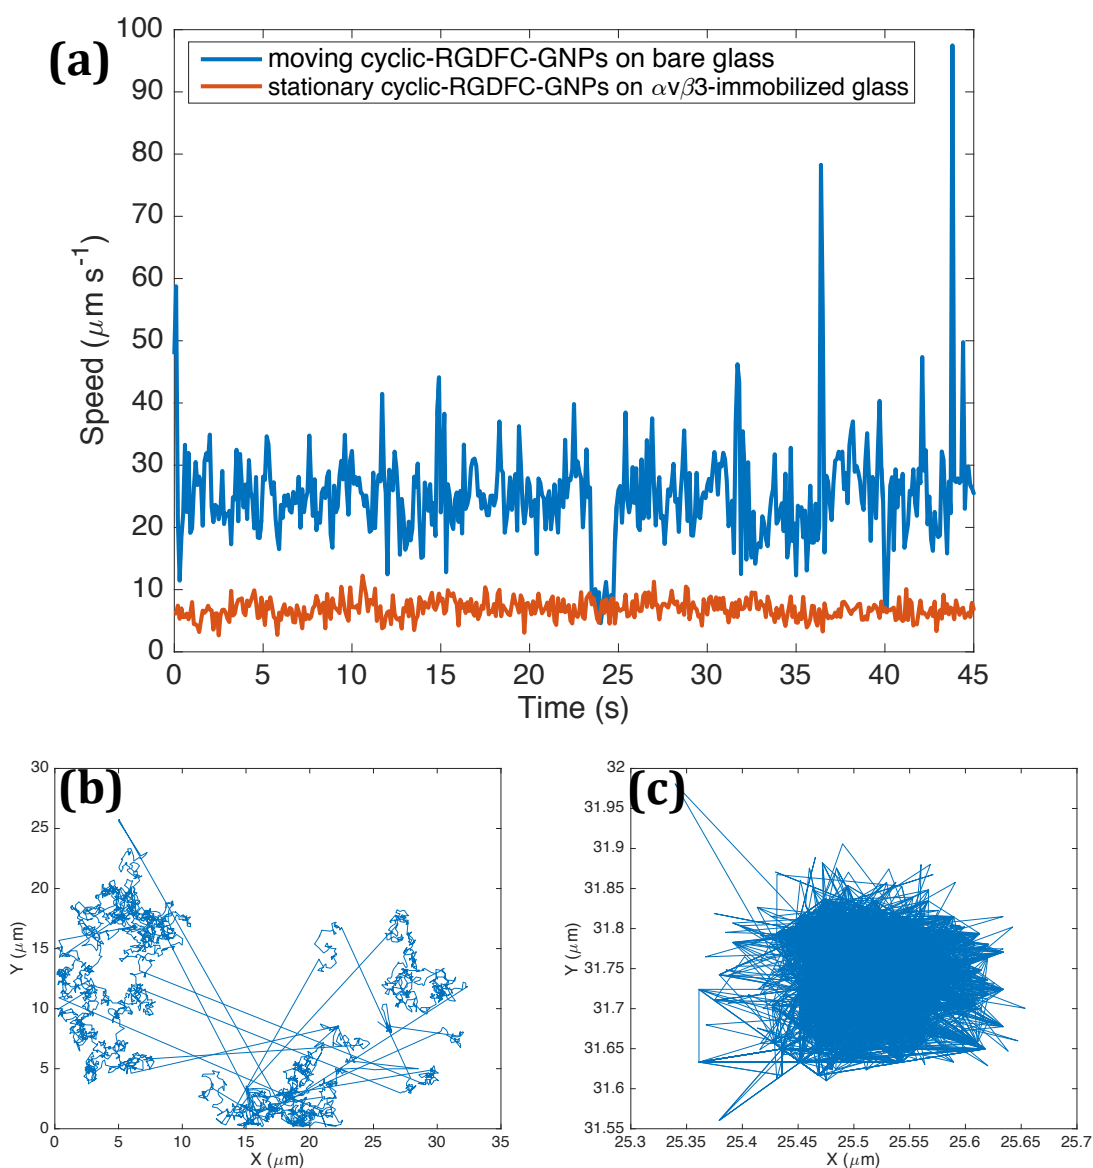

Figure S4. (a) Representative velocity profiles of a cyclic-RGDFC-GNP on bare glass and a stationary GNP on the surface. The velocity of the stationary particle expressed as mean  $\pm$  standard deviation is  $7 \pm 1 \mu\text{m s}^{-1}$ . (b, c) corresponding trajectories of moving (b) and stationary (c) GNPs in (a). The average distances from the centroid of the trajectories for moving and stationary GNPs are  $11.51 \pm 2.85 \mu\text{m}$  and  $0.06 \pm 0.03 \mu\text{m}$ , respectively.

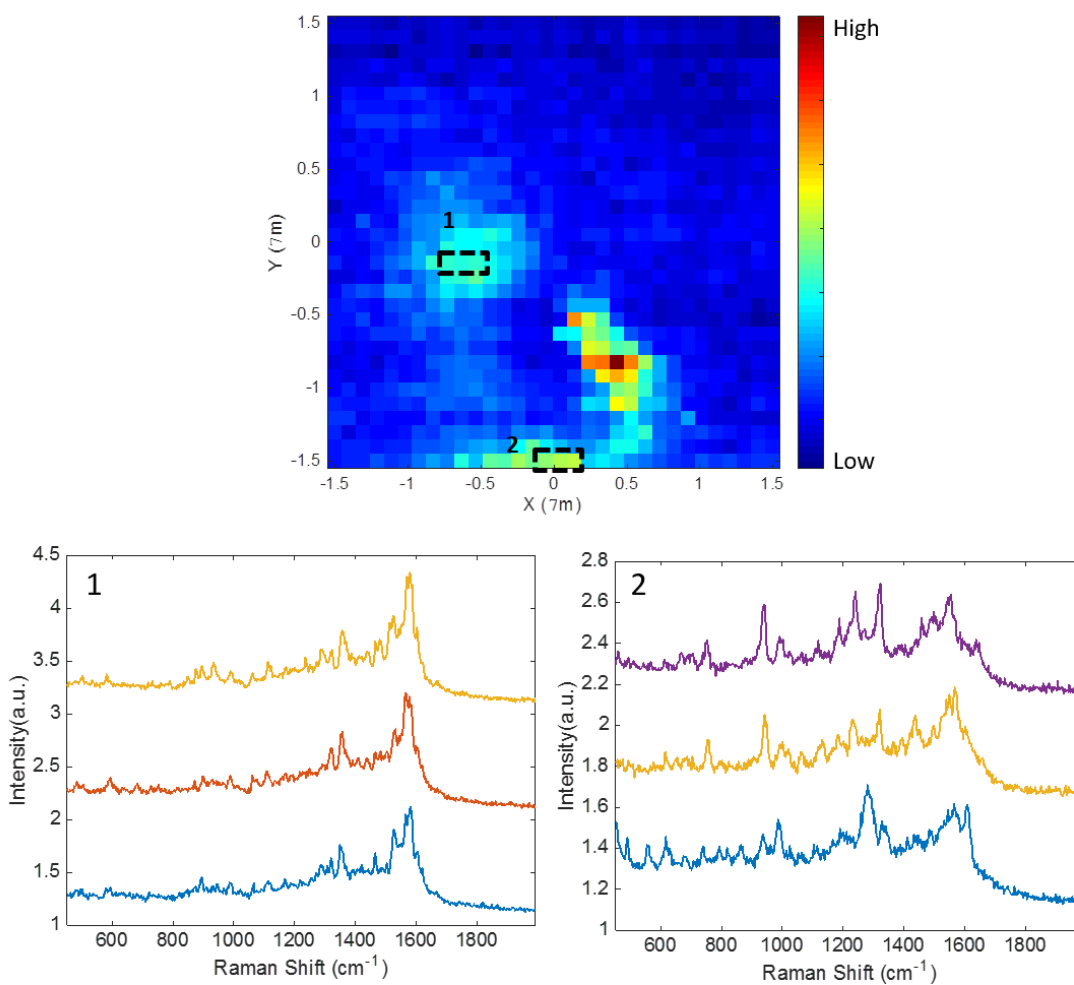

Figure S5. TERS map of cyclic-RGDfC-GNPs bound with sw620 cells. TERS heat map ( $3 \times 3 \mu\text{m}^2$ ) generated using single-peak intensity at  $1002 \text{ cm}^{-1}$  and selected TERS spectra corresponding to dashed boxes (1 and 2) in the map.

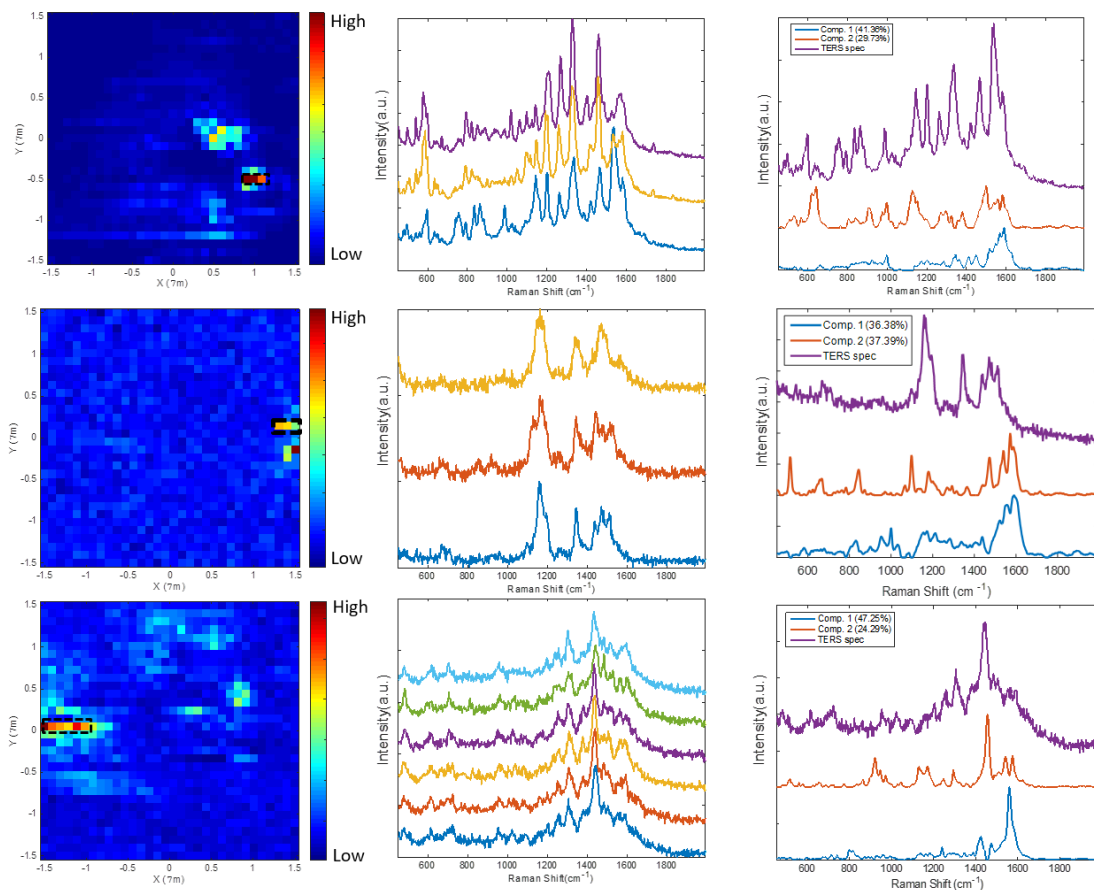

Figure S6. Additional TERS mapping data of SW620 cells incubated with cyclic-RGDFC-GNPs (top), cyclic-isodGRFC-GNPs (middle) and CisoDGRC-GNPs (bottom). Left: MCR score maps. Middle: TERS spectra. Right: TERS spectrum vs. MCR components.

## Hyperspectral imaging

Experiments were performed on an Olympus BX51 microscope. A white light was used for bottom illumination of the SW620 colon cancer cell samples before and after the addition of gold nanoparticles. The scattered light was collected with a water immersion objective (Olympus LUMPLFLN 40XW 0.8 NA), directed into a liquid crystal tunable filter (Channel Systems, VariSpec VIS), and detected by a charge coupled device (CCD) camera (QImaging, Retiga 3000). The filter was tuned from 400 nm to 720 nm at 5 nm intervals with 500 ms acquisition time per frame. Hyperspectral images and scattering spectra were analyzed in ENVI software (Harris Geospatial Solution).

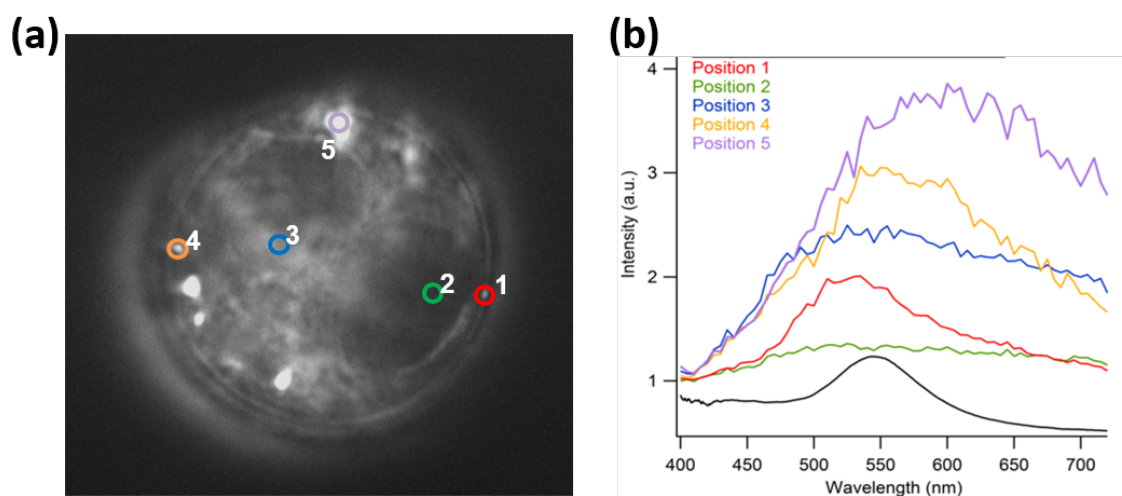

Figure S7. (a) A hyperspectral image with (b) corresponding scattering spectra of a sw620 cell incubated with citrate-GNPs. The black curve in (b) is the spectrum of GNPs.



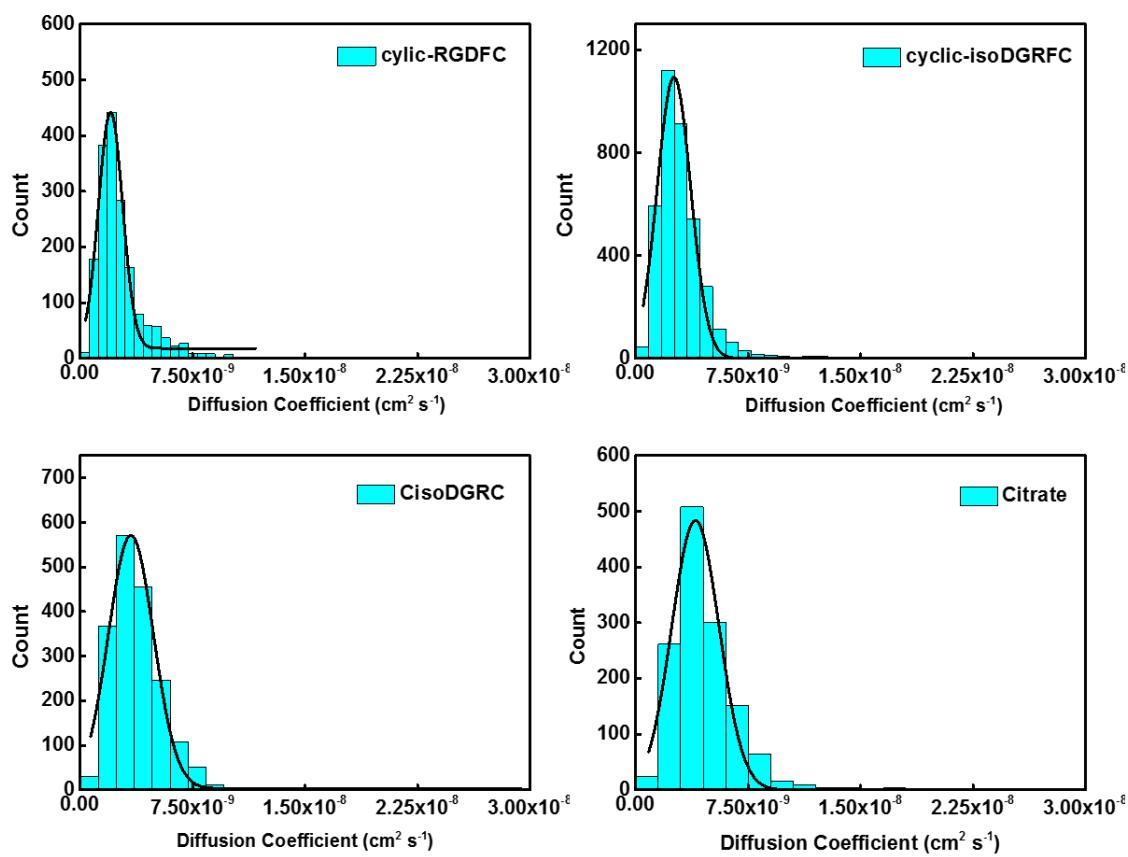

Figure S8. Distribution of diffusion coefficients of ligand-conjugated GNPs interacting with sw620 cells.

Table S1. DLS & zeta potential measurements of gold nanoparticles conjugation with different ligands.

|                      | <b>Size (nm)</b> | <b>Zeta Potential (mV)</b> |
|----------------------|------------------|----------------------------|
| Citrate-GNPs         | 91.87 ± 1.11     | -58.33 ± 0.76              |
| CisoDGRC-GNPs        | 89.64 ± 1.08     | -53.80 ± 0.62              |
| Cyclic-isoDGRFC-GNPs | 87.78 ± 0.52     | -49.90 ± 1.56              |
| Cyclic-RGDFC-GNPs    | 89.00 ± 0.95     | -54.83 ± 0.65              |

Table S2. Raman bands assignments.<sup>1-4</sup>

| <b>SERS bands (cm<sup>-1</sup>)</b> | <b>TERS bands (cm<sup>-1</sup>)</b> | <b>Assignments</b>                    |
|-------------------------------------|-------------------------------------|---------------------------------------|
| 515                                 | 508                                 | Ser                                   |
| 605-617                             | 588-610, 618                        | Amide VI                              |
| 639-641                             | 644                                 | Tyr                                   |
| 844-850                             | 848                                 | Tyr                                   |
| 912                                 | 915                                 | Lys                                   |
| 997-1002                            | 990, 1018                           | Phe, Trp                              |
| 1067, 1097                          | 1067                                | Lys                                   |
| 1127                                | 1116                                | Ser                                   |
| 1152                                | 1149                                | C-N (Protein)                         |
| 1170-1176                           | 1176, 1184                          | Tyr, Phe                              |
| 1239-1243                           | 1221,                               | Amide III                             |
| 1290-1299                           | 1291, 1296                          | Amide III                             |
| 1322-1326, 1351-1355                | 1341, 1367, 1437-1442               | CH, CH <sub>2</sub> , CH <sub>3</sub> |
| 1361-1365                           | 1361                                | Trp                                   |
| 1456                                | 1465                                | Lys                                   |
| 1473-1477                           | 1480-1490                           | Amide II                              |
| 1499-1502                           | 1514, 1519                          | C-C, C=C                              |
| 1542-1544                           | 1542                                | Amide II                              |
| 1560, 1572                          | 1562, 1570, 1575                    | Trp                                   |
| 1579-1582                           | 1595, 1625                          | Phe, Trp, C-C                         |

## REFERENCES

- (1) Movasaghi, Z.; Rehman, S.; Rehman, I. U. *Appl. Spectrosc. Rev.* **2007**, *42*, 493-541.
- (2) De Gelder, J.; De Gussem, K.; Vandenabeele, P.; Moens, L. *J.Raman Spectrosc.* **2007**, *38*, 1133-1147.
- (3) Zhu, G.; Zhu, X.; Fan, Q.; Wan, X. *Spectrochim. Acta, Part A.* **2011**, *78*, 1187-1195.
- (4) Deckert-Gaudig, T.; Kurouski, D.; Hedegaard, M. A.; Singh, P.; Lednev, I. K.; Deckert, V. *Sci.Rep.* **2016**, *6*, 33575.
